# Supplementary material for: Overexpression of the adeB Efflux Pump Gene in Tigecycline-Resistant Acinetobacter baumannii Clinical Isolates and Its Inhibition by (+)Usnic Acid as an Adjuvant
Source: MDPI journal article supplement (doi:10.3390/antibiotics10091037), 2021-08-25

**Table S1 Antimicrobial Susceptibility profile of 42 tigecycline resistant *A. baumannii* isolates**

| Isolate         | PIT | AK | CIP | TR | IMP | MRP | TGC | CL |
|-----------------|-----|----|-----|----|-----|-----|-----|----|
| <b>AI 1444</b>  | R   | R  | R   | R  | R   | R   | R   | S  |
| <b>AI 7574</b>  | R   | R  | R   | R  | R   | R   | R   | R  |
| <b>AI 8164</b>  | R   | R  | R   | R  | R   | R   | R   | S  |
| <b>AI 646-2</b> | R   | R  | R   | R  | R   | R   | R   | S  |
| AI 2796         | R   | R  | R   | R  | R   | R   | R   | S  |
| AI 670          | R   | R  | R   | R  | R   | R   | R   | S  |
| AI 7819         | R   | R  | R   | R  | R   | S   | R   | S  |
| <b>AI 646-5</b> | R   | R  | R   | R  | R   | R   | R   | S  |
| AI 4185         | R   | R  | R   | R  | R   | R   | R   | S  |
| <b>AI 829</b>   | R   | R  | R   | R  | R   | R   | R   | S  |
| <b>AI 6142</b>  | R   | R  | R   | R  | R   | R   | R   | S  |
| AI 1187         | R   | R  | R   | R  | S   | S   | R   | S  |
| AI 2563         | R   | R  | R   | R  | R   | R   | R   | S  |
| AI 6044         | R   | R  | R   | R  | R   | R   | R   | S  |
| AI 7783         | R   | R  | R   | R  | R   | R   | R   | S  |
| <b>AI 6553</b>  | R   | R  | R   | R  | R   | R   | R   | S  |
| <b>AI 5678</b>  | R   | R  | R   | R  | R   | R   | R   | S  |
| <b>AI 6538</b>  | R   | R  | R   | R  | R   | R   | R   | S  |
| AI 8625         | R   | R  | R   | R  | R   | R   | R   | S  |
| <b>AI 3990</b>  | R   | R  | R   | R  | R   | R   | R   | S  |
| AI 3699         | R   | R  | R   | R  | R   | R   | R   | S  |
| AI 4727         | R   | R  | R   | R  | R   | R   | R   | R  |
| <b>AI 4888</b>  | R   | R  | R   | R  | R   | R   | R   | S  |
| <b>AI 3074</b>  | R   | R  | R   | R  | R   | R   | R   | S  |
| AI 3927         | R   | R  | R   | R  | R   | R   | R   | S  |
| AI 6960         | R   | R  | R   | R  | R   | S   | R   | S  |
| <b>AI 899</b>   | R   | R  | R   | R  | R   | R   | R   | S  |
| <b>AI 6428</b>  | R   | R  | R   | R  | R   | R   | R   | S  |
| AI 7703         | R   | R  | R   | R  | S   | R   | R   | S  |
| AI 3636         | R   | R  | R   | R  | R   | R   | R   | S  |
| AI 6372         | R   | R  | R   | R  | R   | R   | R   | S  |
| AI 306          | R   | R  | R   | R  | R   | R   | R   | S  |
| <b>AI 2760</b>  | R   | R  | R   | R  | R   | R   | R   | S  |
| AI 1259         | R   | R  | R   | R  | R   | R   | R   | S  |

|                |   |   |   |   |   |   |   |   |
|----------------|---|---|---|---|---|---|---|---|
| AI 8426        | R | R | R | R | R | R | R | S |
| AI 5096        | R | R | R | R | R | R | R | S |
| <b>AI 2540</b> | R | R | R | R | R | R | R | S |
| <b>AI 7496</b> | R | R | R | R | R | R | R | S |
| <b>AI 5289</b> | R | R | R | R | R | R | R | S |
| AI 3840        | R | R | R | R | R | R | R | S |
| AI 2368        | R | R | R | R | R | R | R | S |
| AI 2218        | R | R | R | R | R | R | R | S |

(PIT – Piperacillin/ Tazobactam, AK – Amikacin, CIP – Ciprofloxacin, TR – Tetracycline, TGC – Tigecycline, IMP – Imipenem, MRP – Meropenem and CL – Colistin)

(R – Resistant, S – Sensitive)

**Figure S1a Melt curve of *adeB* gene of qRT-PCR analysis for (+)-UA + TGC treated and untreated groups**

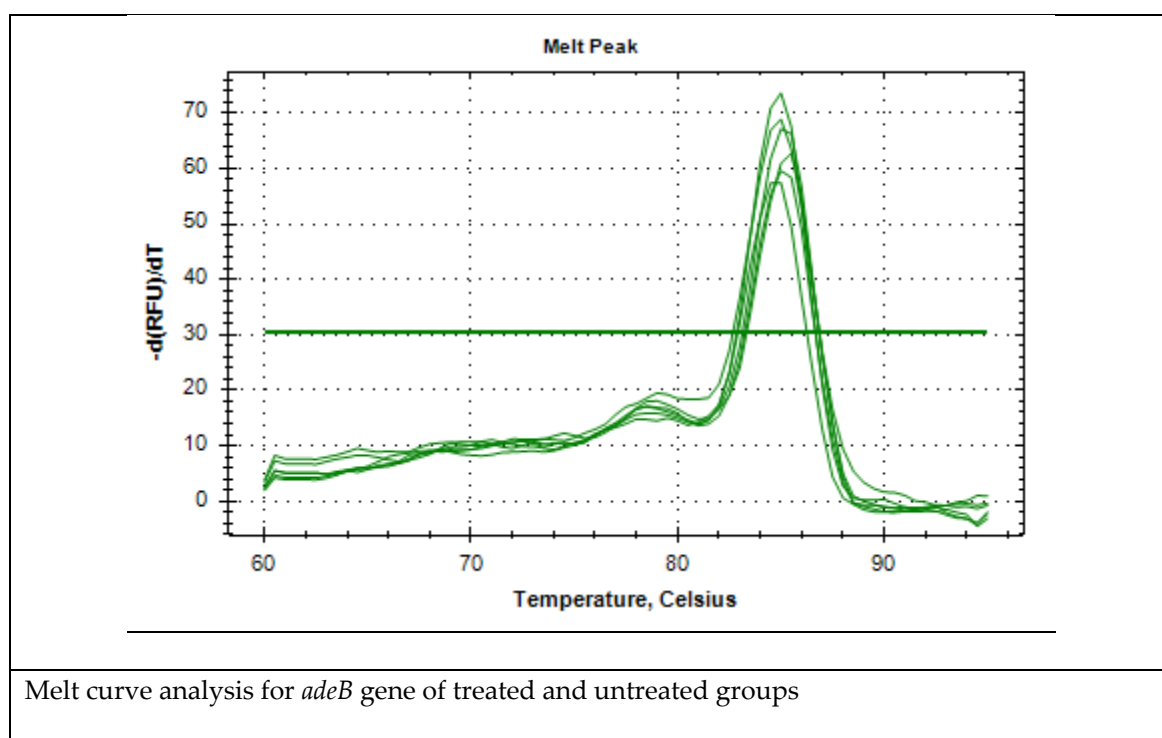

**Figure S1b Amplification of *adeB* gene of qRT-PCR analysis for (+)-UA + TGC treated and untreated groups**

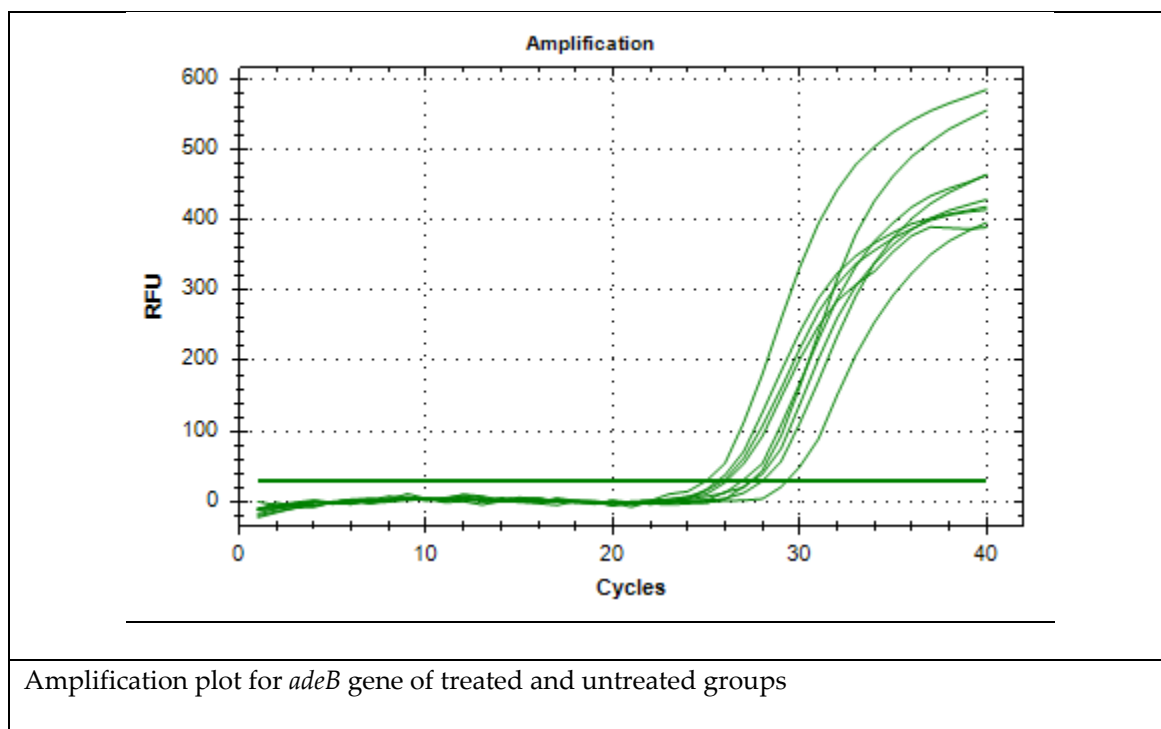

Supplement: s1 [file s1]
